# Supplementary material for: Structural snapshots of La Crosse virus polymerase reveal the mechanisms underlying Peribunyaviridae replication and transcription
Source: PubMed Central journal article supplement (PMC8850483; doi:10.1038/s41467-022-28428-z), 2022-02-16
Supplement: 41467_2022_28428_MOESM3_ESM.pdf [file 41467_2022_28428_MOESM3_ESM.pdf]

### **Description of Additional Supplementary Files**

File Name: Supplementary Movie 1

Description: Replication: LACV-L from preinitiation to late-elongation

File Name: Supplementary Movie 2

Description: Transcription: LACV-L from preinitiation to early-elongation
